# Supplementary material
Source: Springer Nature journal article supplement (https://www.springermedizin.de/resource/supplementary/12970_2007_47_MOESM5_ESM.pdf/9594242)

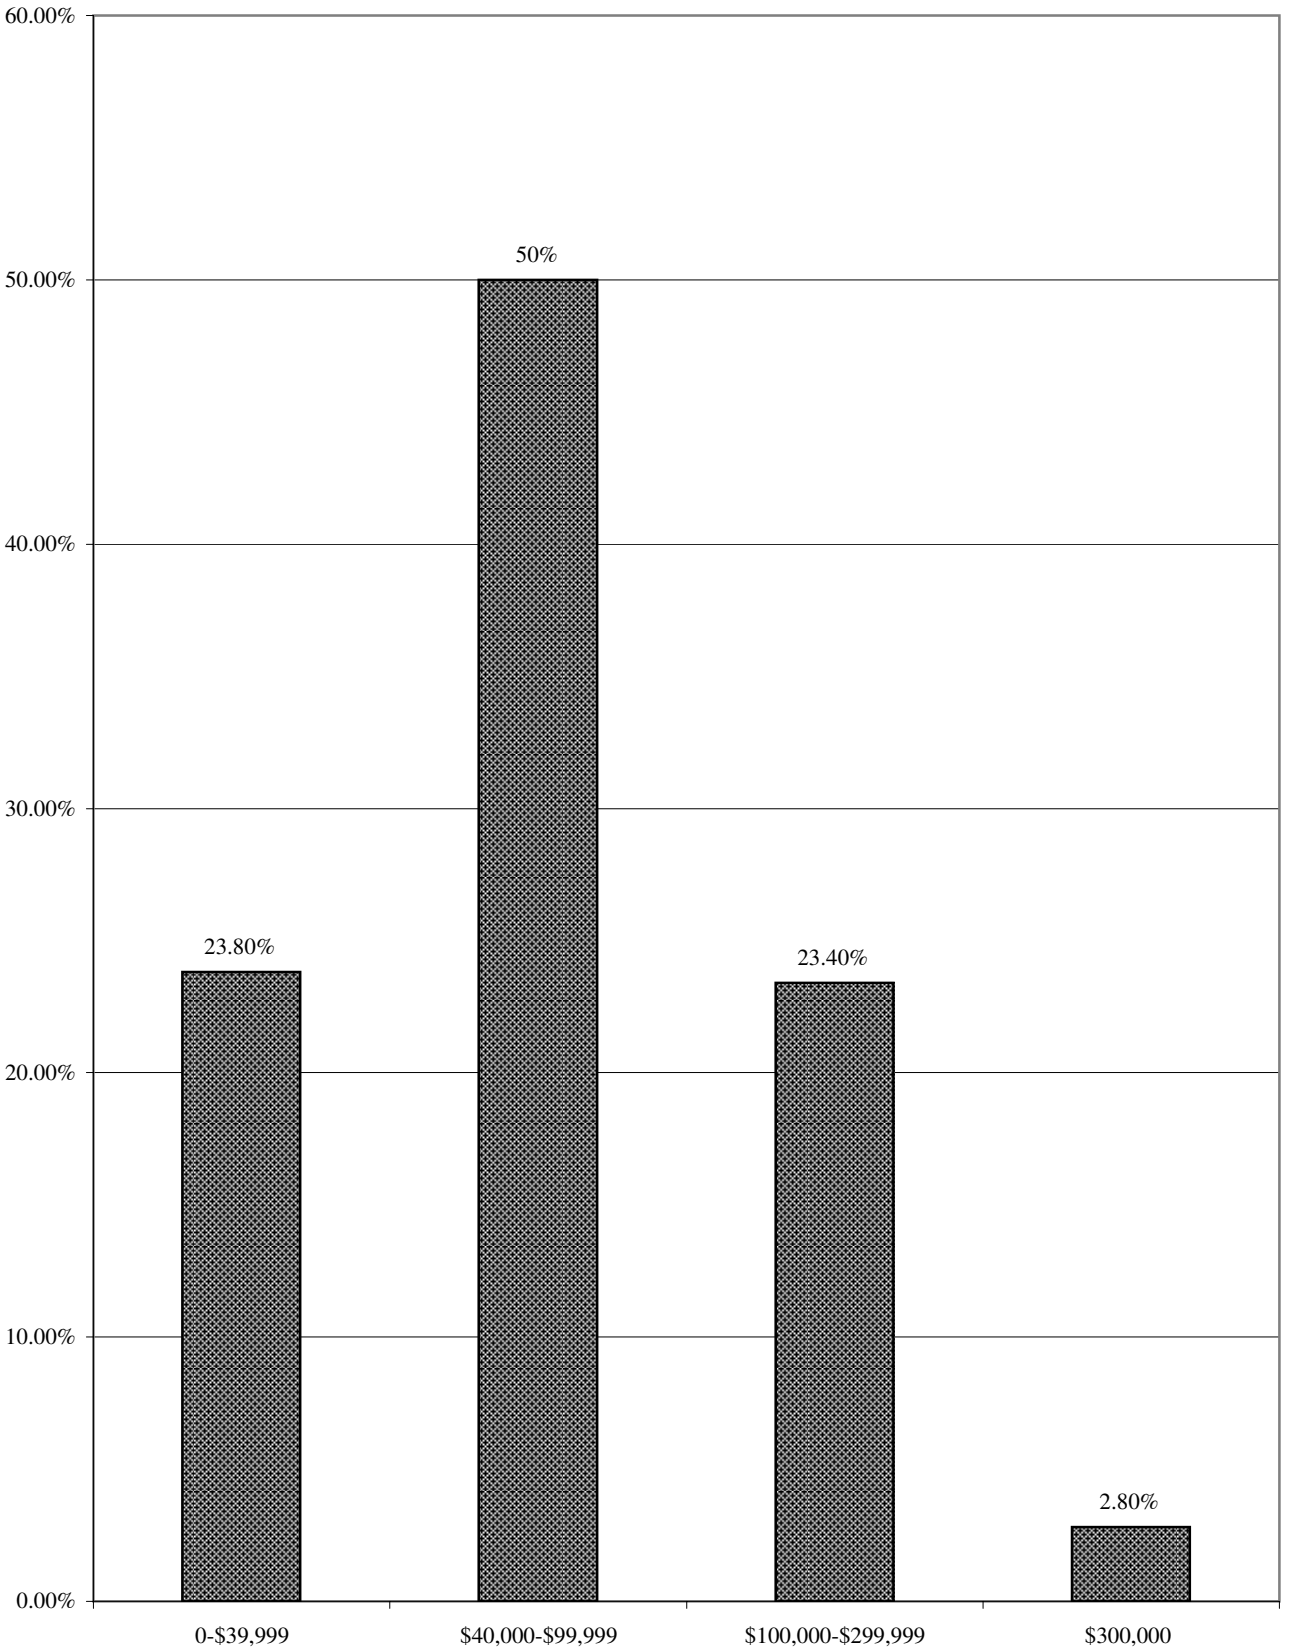

Supplement: MOESM5 [file 9594242]
